# Supplementary material for: Using vessels of opportunity for determining important habitats of bottlenose dolphins in Port Phillip Bay, south-eastern Australia
Source: PeerJ. 2024 Oct 30;12:e18400. doi: 10.7717/peerj.18400 (PMC11531264; doi:10.7717/peerj.18400)
Supplement: Supplemental Information 1 — Sightings sourced from the Victorian Biodiversity Atlas (VBA) database and 3 ecotour vessels (Sea All Dolphin Swims, Moonraker Dolphin Swims and Polperro Dolphin Swims) in southern Port Phillip Bay. [file peerj-12-18400-s001.xlsx]

## Sheet: Sheet1
date	time	long	lat	source
2006-05-31	x	144.928	-37.855	VBA
2006-05-31	x	144.932	-37.861	VBA
2006-09-28	x	144.981	-38.277	VBA
2006-09-28	x	145.005	-38.255	VBA
2006-10-10	x	144.895	-38.34	VBA
2006-10-10	x	144.962	-38.291	VBA
2006-10-19	x	145.028	-38.217	VBA
2006-10-19	x	145.022	-38.24	VBA
2006-10-22	x	145.014	-38.249	VBA
2006-10-29	x	144.724	-37.973	VBA
2006-10-29	x	144.773	-37.948	VBA
2006-10-31	x	144.724	-38.299	VBA
2006-10-31	x	144.691	-38.291	VBA
2006-10-31	x	144.726	-38.287	VBA
2006-10-31	x	144.682	-38.292	VBA
2007-02-15	x	144.815	-38.357	VBA
2007-02-15	x	144.8	-38.359	VBA
2007-02-26	x	144.695	-38.269	VBA
2007-03-06	x	144.698	-38.3	VBA
2007-03-09	x	144.709	-38.313	VBA
2007-03-09	x	144.738	-38.317	VBA
2007-03-09	x	144.703	-38.311	VBA
2007-05-10	x	145.058	-38.181	VBA
2007-05-11	x	145.081	-38.166	VBA
2007-05-12	x	144.74	-38.323	VBA
2007-05-12	x	144.833	-38.332	VBA
2007-05-18	x	144.82	-37.901	VBA
2007-05-18	x	144.751	-37.966	VBA
2007-09-06	x	144.97	-37.885	VBA
2007-09-06	x	144.961	-37.884	VBA
2007-09-06	x	144.969	-37.908	VBA
2007-09-07	x	144.971	-37.893	VBA
2007-09-07	x	144.97	-37.907	VBA
2007-09-07	x	144.959	-37.905	VBA
2007-09-07	x	144.888	-37.9	VBA
2007-09-08	x	145.116	-38.065	VBA
2007-09-23	x	144.959	-38.322	VBA
2007-10-06	x	144.86	-38.333	VBA
2007-10-08	x	144.925	-38.344	VBA
2007-10-17	x	145.033	-38.209	VBA
2008-01-25	x	144.741	-38.323	VBA
2008-02-15	x	144.726	-38.315	VBA
2008-02-15	x	144.654	-38.294	VBA
2008-05-22	x	144.954	-37.878	VBA
2008-05-29	x	144.775	-38.33	VBA
2008-10-10	x	145.069	-38.165	VBA
2008-10-17	x	144.979	-37.932	VBA
2009-01-07	x	145.065	-38.181	VBA
2009-01-07	x	145.065	-38.187	VBA
2009-01-09	x	144.902	-38.345	VBA
2009-01-10	x	144.815	-38.362	VBA
2009-01-10	x	144.843	-38.35	VBA
2009-01-20	x	144.756	-38.329	VBA
2009-03-23	x	145.027	-38.205	VBA
2009-05-05	x	144.844	-38.344	VBA
2009-05-05	x	144.864	-38.348	VBA
2009-05-05	x	144.784	-38.359	VBA
2009-05-20	x	144.923	-38.328	VBA
2009-05-20	x	144.918	-38.332	VBA
2009-10-19	x	144.774	-38.354	VBA
2009-10-19	x	144.844	-38.359	VBA
2009-10-19	x	144.84	-38.355	VBA
2010-01-10	x	144.772	-38.351	VBA
2010-01-10	x	144.776	-38.354	VBA
2010-01-10	x	144.785	-38.358	VBA
2010-01-13	x	144.657	-38.299	VBA
2010-01-14	x	144.833	-38.362	VBA
2010-01-14	x	144.849	-38.362	VBA
2010-01-14	x	144.774	-38.352	VBA
2010-02-17	x	144.784	-38.304	VBA
2010-02-17	x	144.784	-38.294	VBA
2010-02-17	x	144.807	-38.291	VBA
2010-02-24	x	144.995	-38.272	VBA
2010-02-24	x	145.004	-38.264	VBA
2010-11-09	14:40:19	144.674	-38.266	Ecotour boat
2010-12-03	13:41:05	144.693	-38.311	Ecotour boat
2011-01-13	12:29:28	144.668	-38.304	Ecotour boat
2011-02-03	12:12:28	144.712	-38.272	Ecotour boat
2011-02-03	12:44:03	144.717	-38.267	Ecotour boat
2011-02-03	09:43:25	144.689	-38.308	Ecotour boat
2011-02-03	10:11:22	144.689	-38.302	Ecotour boat
2011-02-03	11:23:36	144.703	-38.299	Ecotour boat
2011-02-04	11:59:09	144.706	-38.281	Ecotour boat
2011-02-09	09:25:10	144.7	-38.311	Ecotour boat
2011-02-09	10:18:51	144.709	-38.311	Ecotour boat
2011-02-09	10:36:37	144.716	-38.31	Ecotour boat
2011-02-09	11:08:25	144.714	-38.311	Ecotour boat
2011-02-09	11:23:53	144.695	-38.297	Ecotour boat
2011-02-09	11:48:37	144.697	-38.308	Ecotour boat
2011-02-11	15:50:52	144.725	-38.318	Ecotour boat
2011-02-11	16:21:38	144.741	-38.314	Ecotour boat
2011-02-23	x	144.742	-38.325	VBA
2011-03-03	11:46:00	144.678	-38.304	Ecotour boat
2011-03-03	13:59:44	144.711	-38.308	Ecotour boat
2011-03-03	14:17:12	144.697	-38.307	Ecotour boat
2011-03-03	14:33:09	144.699	-38.309	Ecotour boat
2011-03-10	09:54:45	144.727	-38.317	Ecotour boat
2011-03-10	10:10:55	144.74	-38.323	Ecotour boat
2011-03-10	11:00:59	144.727	-38.288	Ecotour boat
2011-03-11	10:34:31	144.739	-38.317	Ecotour boat
2011-03-11	11:04:30	144.745	-38.32	Ecotour boat
2011-03-12	11:04:15	144.741	-38.323	Ecotour boat
2011-04-06	x	144.742	-38.325	VBA
2011-04-06	x	144.743	-38.3	VBA
2011-04-06	x	144.784	-38.291	VBA
2011-04-06	x	144.799	-38.291	VBA
2011-04-06	x	144.727	-38.31	VBA
2011-04-07	x	144.857	-38.323	VBA
2011-04-07	x	144.795	-38.289	VBA
2011-04-12	11:51:41	144.678	-38.304	Ecotour boat
2011-04-12	12:10:51	144.679	-38.302	Ecotour boat
2011-04-14	12:09:19	144.711	-38.274	Ecotour boat
2011-04-14	13:41:44	144.701	-38.282	Ecotour boat
2011-04-14	17:03:00	144.766	-38.299	Ecotour boat
2011-04-15	09:48:32	144.685	-38.304	Ecotour boat
2011-04-16	11:55:30	144.677	-38.303	Ecotour boat
2011-04-17	10:31:50	144.708	-38.309	Ecotour boat
2011-04-17	11:31:18	144.721	-38.29	Ecotour boat
2011-04-17	12:00:00	144.975	-38.309	Ecotour boat
2011-04-17	15:41:07	144.722	-38.316	Ecotour boat
2011-04-17	16:14:58	144.727	-38.311	Ecotour boat
2011-04-17	16:30:13	144.724	-38.308	Ecotour boat
2011-04-17	16:49:01	144.688	-38.281	Ecotour boat
2011-04-25	x	144.772	-38.352	VBA
2011-04-25	x	144.719	-38.317	VBA
2011-05-19	14:59:44	144.7	-38.313	Ecotour boat
2011-05-19	15:54:46	144.646	-38.3	Ecotour boat
2011-05-29	x	144.917	-38.337	VBA
2011-11-11	12:06:02	144.775	-38.353	Ecotour boat
2011-11-11	10:45:30	144.71	-38.315	Ecotour boat
2011-11-11	11:06:05	144.729	-38.319	Ecotour boat
2011-11-11	11:40:07	144.757	-38.339	Ecotour boat
2011-11-17	10:36:47	144.805	-38.362	Ecotour boat
2011-11-17	10:56:03	144.805	-38.36	Ecotour boat
2011-11-17	11:13:54	144.804	-38.361	Ecotour boat
2011-11-17	11:44:22	144.803	-38.36	Ecotour boat
2011-11-17	12:22:41	144.793	-38.359	Ecotour boat
2011-11-17	12:55:24	144.798	-38.361	Ecotour boat
2011-11-17	13:27:19	144.811	-38.362	Ecotour boat
2011-11-17	14:18:31	144.837	-38.352	Ecotour boat
2011-11-17	14:51:55	144.852	-38.337	Ecotour boat
2011-11-17	15:14:52	144.864	-38.336	Ecotour boat
2011-11-24	11:07:03	144.84	-38.363	Ecotour boat
2011-12-07	14:49:18	144.734	-38.314	Ecotour boat
2011-12-15	09:23:31	144.683	-38.272	Ecotour boat
2011-12-15	09:50:22	144.684	-38.283	Ecotour boat
2011-12-29	09:30:14	144.693	-38.277	Ecotour boat
2011-12-29	09:51:34	144.7	-38.279	Ecotour boat
2011-12-29	10:06:51	144.707	-38.274	Ecotour boat
2011-12-29	10:23:13	144.702	-38.271	Ecotour boat
2011-12-29	10:42:02	144.705	-38.274	Ecotour boat
2012-01-03	09:39:36	144.706	-38.297	Ecotour boat
2012-01-03	09:55:56	144.693	-38.302	Ecotour boat
2012-01-03	10:28:04	144.678	-38.302	Ecotour boat
2012-01-03	14:32:27	144.679	-38.265	Ecotour boat
2012-01-03	15:07:13	144.697	-38.252	Ecotour boat
2012-01-06	15:17:32	144.688	-38.287	Ecotour boat
2012-01-06	15:54:17	144.672	-38.269	Ecotour boat
2012-02-01	15:53:52	144.69	-38.307	Ecotour boat
2012-02-01	16:10:30	144.689	-38.299	Ecotour boat
2012-02-09	13:25:43	144.703	-38.28	Ecotour boat
2012-02-09	11:01:21	144.894	-38.343	Ecotour boat
2012-02-09	11:49:26	144.934	-38.335	Ecotour boat
2012-02-14	15:29:47	144.74	-38.323	Ecotour boat
2012-02-14	15:47:56	144.721	-38.317	Ecotour boat
2012-02-22	15:19:03	144.717	-38.285	Ecotour boat
2012-02-28	15:30:37	144.663	-38.295	Ecotour boat
2012-02-28	16:03:54	144.691	-38.31	Ecotour boat
2012-02-29	11:07:41	144.744	-38.321	Ecotour boat
2012-03-04	11:35:46	144.669	-38.304	Ecotour boat
2012-03-06	11:06:17	144.744	-38.323	Ecotour boat
2012-03-06	11:24:36	144.732	-38.312	Ecotour boat
2012-03-06	11:40:53	144.741	-38.316	Ecotour boat
2012-03-06	15:15:47	144.727	-38.312	Ecotour boat
2012-03-09	09:29:18	144.706	-38.279	Ecotour boat
2012-03-09	09:50:12	144.715	-38.268	Ecotour boat
2012-03-13	15:46:37	144.725	-38.299	Ecotour boat
2012-03-13	16:04:12	144.728	-38.306	Ecotour boat
2012-03-13	12:36:08	144.74	-38.323	Ecotour boat
2012-03-13	12:53:26	144.735	-38.318	Ecotour boat
2012-03-27	12:12:20	144.715	-38.307	Ecotour boat
2012-03-27	12:52:04	144.733	-38.316	Ecotour boat
2012-03-28	14:57:09	144.714	-38.294	Ecotour boat
2012-03-28	11:25:25	144.716	-38.312	Ecotour boat
2012-03-28	14:28:01	144.728	-38.287	Ecotour boat
2012-03-29	15:36:30	144.724	-38.309	Ecotour boat
2012-03-29	15:52:50	144.723	-38.309	Ecotour boat
2012-03-29	15:13:20	144.733	-38.319	Ecotour boat
2012-04-02	16:21:33	144.721	-38.303	Ecotour boat
2012-04-02	16:39:32	144.713	-38.299	Ecotour boat
2012-04-05	x	144.798	-38.299	VBA
2012-04-07	15:39:59	144.692	-38.308	Ecotour boat
2012-04-07	15:56:58	144.698	-38.311	Ecotour boat
2012-04-08	14:33:57	144.719	-38.312	Ecotour boat
2012-04-08	14:54:34	144.739	-38.322	Ecotour boat
2012-04-08	15:12:15	144.738	-38.321	Ecotour boat
2012-04-11	09:57:22	144.743	-38.324	Ecotour boat
2012-04-11	10:16:58	144.744	-38.324	Ecotour boat
2012-04-12	13:46:49	144.706	-38.26	Ecotour boat
2012-04-12	14:04:06	144.706	-38.256	Ecotour boat
2012-04-13	14:27:22	144.716	-38.293	Ecotour boat
2012-04-20	12:22:49	144.718	-38.311	Ecotour boat
2012-04-27	10:31:55	144.742	-38.318	Ecotour boat
2012-04-29	x	144.766	-38.313	VBA
2012-04-29	x	144.761	-38.318	VBA
2012-10-02	x	145.011	-38.052	VBA
2012-10-09	x	144.964	-38.322	VBA
2012-10-09	14:06:05	144.958	-38.325	Ecotour boat
2012-10-16	11:35:32	144.701	-38.284	Ecotour boat
2012-10-16	12:09:19	144.698	-38.275	Ecotour boat
2012-10-16	09:50:49	144.782	-38.356	Ecotour boat
2012-10-16	10:07:59	144.77	-38.351	Ecotour boat
2012-10-16	10:25:48	144.759	-38.342	Ecotour boat
2012-10-16	10:46:38	144.745	-38.332	Ecotour boat
2012-11-07	14:44:48	144.661	-38.301	Ecotour boat
2012-11-07	15:04:01	144.651	-38.299	Ecotour boat
2012-11-13	13:43:48	144.69	-38.277	Ecotour boat
2012-11-14	13:37:50	144.675	-38.265	Ecotour boat
2012-11-15	12:09:17	144.79	-38.33	Ecotour boat
2012-11-15	12:26:41	144.794	-38.318	Ecotour boat
2012-11-15	15:12:40	144.689	-38.285	Ecotour boat
2012-11-15	11:31:51	144.783	-38.354	Ecotour boat
2012-11-15	11:48:25	144.79	-38.344	Ecotour boat
2012-11-22	10:41:28	144.779	-38.354	Ecotour boat
2012-11-22	11:14:27	144.788	-38.358	Ecotour boat
2012-11-22	11:37:22	144.796	-38.36	Ecotour boat
2012-11-23	11:52:23	144.689	-38.309	Ecotour boat
2012-11-28	12:47:48	144.683	-38.267	Ecotour boat
2012-12-14	16:14:42	144.689	-38.3	Ecotour boat
2012-12-21	15:12:50	144.694	-38.304	Ecotour boat
2012-12-21	15:30:27	144.699	-38.303	Ecotour boat
2013-01-02	09:42:03	144.703	-38.308	Ecotour boat
2013-01-07	11:12:26	144.742	-38.327	Ecotour boat
2013-01-07	11:30:36	144.761	-38.336	Ecotour boat
2013-02-04	14:43:00	144.743	-38.325	Ecotour boat
2013-02-08	13:09:38	145.104	-38.088	Ecotour boat
2013-02-08	x	145.114	-38.095	VBA
2013-02-08	x	145.117	-38.072	VBA
2013-02-08	15:00:40	145.111	-38.067	Ecotour boat
2013-02-14	12:51:10	144.916	-38.336	Ecotour boat
2013-02-14	13:06:42	144.913	-38.331	Ecotour boat
2013-02-14	13:53:59	144.926	-38.324	Ecotour boat
2013-02-15	15:38:43	144.784	-38.356	Ecotour boat
2013-02-20	10:46:33	144.744	-38.326	Ecotour boat
2013-02-21	11:01:59	144.726	-38.304	Ecotour boat
2013-03-05	14:47:56	144.747	-38.315	Ecotour boat
2013-03-07	10:14:30	144.721	-38.312	Ecotour boat
2013-03-07	10:46:10	144.725	-38.315	Ecotour boat
2013-03-07	11:04:57	144.724	-38.317	Ecotour boat
2013-03-07	11:19:57	144.728	-38.318	Ecotour boat
2013-03-07	11:53:52	144.748	-38.335	Ecotour boat
2013-03-07	12:24:28	144.774	-38.351	Ecotour boat
2013-03-07	12:59:09	144.797	-38.36	Ecotour boat
2013-03-07	13:50:54	144.801	-38.361	Ecotour boat
2013-03-07	14:07:43	144.795	-38.36	Ecotour boat
2013-03-07	14:22:43	144.796	-38.36	Ecotour boat
2013-03-07	14:40:23	144.787	-38.354	Ecotour boat
2013-03-08	11:13:58	144.697	-38.31	Ecotour boat
2013-03-10	11:21:26	144.928	-38.212	Ecotour boat
2013-03-10	11:50:40	144.953	-38.189	Ecotour boat
2013-03-10	x	144.932	-38.213	VBA
2013-03-10	x	144.954	-38.19	VBA
2013-03-18	12:36:04	144.708	-38.317	Ecotour boat
2013-03-19	11:09:27	144.74	-38.322	Ecotour boat
2013-03-19	15:55:58	144.671	-38.303	Ecotour boat
2013-03-25	12:01:28	145.031	-38.192	Ecotour boat
2013-03-25	12:46:42	145.01	-38.229	Ecotour boat
2013-03-25	x	145.032	-38.19	VBA
2013-03-25	x	145.01	-38.229	VBA
2013-03-25	x	144.963	-38.243	VBA
2013-03-29	14:13:01	144.706	-38.315	Ecotour boat
2013-03-30	13:57:48	144.698	-38.27	Ecotour boat
2013-03-30	14:21:06	144.702	-38.276	Ecotour boat
2013-03-30	14:36:20	144.708	-38.284	Ecotour boat
2013-04-03	14:42:05	144.753	-38.323	Ecotour boat
2013-04-04	09:49:29	144.74	-38.321	Ecotour boat
2013-04-04	10:10:37	144.736	-38.319	Ecotour boat
2013-04-04	10:44:33	144.732	-38.32	Ecotour boat
2013-04-04	11:02:54	144.711	-38.308	Ecotour boat
2013-04-04	11:50:02	144.723	-38.279	Ecotour boat
2013-04-05	14:20:57	144.746	-38.322	Ecotour boat
2013-04-05	14:58:07	144.747	-38.331	Ecotour boat
2013-04-11	12:29:21	144.673	-38.304	Ecotour boat
2013-04-12	16:30:57	144.723	-38.318	Ecotour boat
2013-04-12	16:52:38	144.719	-38.316	Ecotour boat
2013-04-17	12:14:11	144.739	-38.322	Ecotour boat
2013-04-18	10:59:11	144.701	-38.311	Ecotour boat
2013-05-10	x	145.023	-38.203	VBA
2013-09-03	x	144.918	-38.282	VBA
2013-09-03	x	145.072	-38.161	VBA
2014-03-13	11:21:52	145.01	-38.253	Ecotour boat
2014-03-13	x	145.01	-38.253	VBA
2014-03-13	x	145.007	-38.228	VBA
2014-03-13	x	144.976	-38.243	VBA
2014-03-13	x	144.95	-38.258	VBA
2014-03-13	13:53:46	145.007	-38.228	Ecotour boat
2014-03-13	14:10:13	144.995	-38.23	Ecotour boat
2014-03-13	14:52:55	144.973	-38.247	Ecotour boat
2015-05-24	x	144.903	-38.337	Ecotour boat
2015-05-26	x	144.779	-38.326	Ecotour boat
2015-05-26	x	144.742	-38.324	Ecotour boat
2015-05-26	x	144.747	-38.333	Ecotour boat
2015-09-25	x	145.031	-38.206	Ecotour boat
2015-09-26	x	145.014	-38.254	Ecotour boat
2015-09-26	x	145.006	-38.242	Ecotour boat
2015-10-29	x	145.037	-38.198	Ecotour boat
2015-10-29	x	145.016	-38.207	Ecotour boat
2015-10-29	x	144.994	-38.248	Ecotour boat
2015-10-30	x	144.99	-38.256	Ecotour boat
2015-10-30	x	145.003	-38.261	Ecotour boat
2015-10-30	x	144.936	-38.328	Ecotour boat
2015-10-30	x	144.865	-38.334	Ecotour boat
2015-11-16	x	145.052	-38.181	Ecotour boat
2015-11-16	x	144.99	-38.22	Ecotour boat
2015-11-18	x	145.016	-38.252	Ecotour boat
2015-11-18	x	144.985	-38.258	Ecotour boat
2015-11-18	x	144.984	-38.303	Ecotour boat
2015-11-18	x	144.968	-38.316	Ecotour boat
2015-11-18	x	144.973	-38.322	Ecotour boat
2015-11-18	x	144.941	-38.324	Ecotour boat
2015-11-20	x	144.805	-38.36	Ecotour boat
2015-11-20	x	144.71	-38.297	Ecotour boat
2015-11-20	x	144.727	-38.305	Ecotour boat
2015-11-20	x	144.76	-38.341	Ecotour boat
2015-11-28	x	144.795	-38.36	Ecotour boat
2015-12-13	x	145.027	-38.223	Ecotour boat
2015-12-13	x	144.951	-38.305	VBA
2016-01-19	x	144.792	-38.349	VBA
2016-01-19	x	144.876	-38.324	VBA
2016-01-20	x	144.946	-38.305	VBA
2016-01-20	x	144.94	-38.32	VBA
2016-02-01	x	144.821	-38.359	VBA
2016-02-01	x	144.797	-38.358	VBA
2016-02-02	x	144.797	-38.361	VBA
2016-02-02	x	144.916	-38.331	VBA
2016-03-11	x	144.984	-38.316	VBA
2016-03-11	x	145.024	-38.225	VBA
2016-03-11	x	144.969	-38.28	VBA
2016-03-11	x	144.953	-38.293	VBA
2016-03-11	x	144.896	-38.323	VBA
2016-03-24	x	145.018	-38.213	VBA
2016-04-19	x	144.776	-38.337	VBA
2016-05-12	x	145.093	-38.147	VBA
2016-05-12	x	145.015	-38.25	VBA
2016-10-28	x	144.801	-38.361	VBA
2016-10-28	x	144.811	-38.362	VBA
2016-11-29	x	144.923	-38.327	VBA
2016-11-29	x	144.808	-38.361	VBA
2016-11-29	x	144.795	-38.359	VBA
2016-11-29	x	144.788	-38.358	VBA
2016-11-29	x	144.901	-38.33	VBA
2016-12-12	x	145.107	-38.132	VBA
2016-12-12	x	145.101	-38.048	VBA
2017-05-26	x	145.117	-38.117	VBA
2017-11-29	x	145.016	-38.195	VBA
2019-01-10	09:43:54	144.78	-38.346	Ecotour boat
2019-01-10	10:23:17	144.74	-38.316	Ecotour boat
2019-01-30	11:29:23	144.731	-38.3	Ecotour boat
2019-01-30	13:19:04	144.741	-38.323	Ecotour boat
2019-01-30	13:36:14	144.743	-38.323	Ecotour boat
2019-02-15	13:23:20	144.744	-38.324	Ecotour boat
2019-02-15	14:02:44	144.746	-38.321	Ecotour boat
2019-02-22	15:29:15	144.737	-38.3168	Ecotour boat
2019-03-04	14:59:23	144.73	-38.318	Ecotour boat
2019-03-20	13:39:14	144.739	-38.323	Ecotour boat
2019-03-20	14:49:52	144.719	-38.31	Ecotour boat
2021-12-30	12:00:00	144.728	-38.267	Ecotour boat
2021-12-30	09:06:18	144.725	-38.2608	Ecotour boat
2022-01-09	09:36:18	144.733	-38.312	Ecotour boat
2022-01-11	11:25:03	144.701	-38.3002	Ecotour boat
2022-01-11	15:38:28	144.715	-38.3055	Ecotour boat
2022-01-16	14:41:03	144.692	-38.2756	Ecotour boat
2022-01-16	15:13:03	144.701	-38.2712	Ecotour boat
2022-01-16	09:21:05	144.703	-38.2879	Ecotour boat
2022-01-17	13:44:13	144.71	-38.2933	Ecotour boat
2022-01-17	14:29:16	144.684	-38.3005	Ecotour boat
2022-01-21	11:34:09	144.742	-38.3198	Ecotour boat
2022-01-21	11:51:17	144.745	-38.3235	Ecotour boat
2022-01-21	12:06:18	144.747	-38.3292	Ecotour boat
2022-01-26	09:15:15	144.683	-38.3	Ecotour boat
2022-01-26	10:09:00	144.727	-38.2879	Ecotour boat
2022-02-19	09:46:20	144.806	-38.359	Ecotour boat
2022-02-19	10:05:12	144.813	-38.3617	Ecotour boat
2022-03-11	10:40:21	144.704	-38.3117	Ecotour boat
2022-03-11	12:37:17	144.747	-38.3233	Ecotour boat
2022-03-13	11:16:11	144.734	-38.321	Ecotour boat
2022-03-13	13:04:00	144.735	-38.3197	Ecotour boat
2022-03-13	13:45:17	144.75	-38.3221	Ecotour boat
2022-03-26	10:18:02	144.734	-38.3192	Ecotour boat
2022-03-26	11:31:10	144.74	-38.3209	Ecotour boat
2022-09-01	11:24:42	144.67	-38.2644	Ecotour boat
2022-09-07	14:40:01	144.685	-38.2718	Ecotour boat
2022-09-10	10:24:44	144.668	-38.2738	Ecotour boat
2022-09-11	13:40:44	144.67	-38.2726	Ecotour boat
2022-09-13	12:26:41	144.713	-38.2412	Ecotour boat
2022-09-23	10:47:10	144.672	-38.2649	Ecotour boat
2022-09-23	12:45:10	144.668	-38.2715	Ecotour boat
2022-09-24	10:40:15	144.675	-38.2653	Ecotour boat
2022-09-24	11:07:24	144.669	-38.275	Ecotour boat
2022-09-27	09:25:45	144.682	-38.2689	Ecotour boat
2022-10-01	12:17:49	144.663	-38.2762	Ecotour boat
2022-10-01	12:42:28	144.676	-38.2706	Ecotour boat
2022-10-02	15:42:12	144.675	-38.2731	Ecotour boat
2022-10-02	16:05:37	144.672	-38.2732	Ecotour boat
2022-10-02	15:14:41	144.675	-38.2786	Ecotour boat
2022-10-03	12:05:11	144.61	-38.1022	Ecotour boat
2022-10-07	09:11:45	144.665	-38.2732	Ecotour boat
2022-10-08	09:47:56	144.67	-38.2724	Ecotour boat
2022-10-09	12:02:27	144.67	-38.2734	Ecotour boat
2022-10-09	13:20:03	144.674	-38.2722	Ecotour boat
2022-10-09	15:37:27	144.683	-38.2675	Ecotour boat
2022-10-10	12:47:10	144.667	-38.2802	Ecotour boat
2022-10-11	12:47:08	144.675	-38.28	Ecotour boat
2022-10-11	16:51:41	144.668	-38.2708	Ecotour boat
2022-10-21	09:51:59	144.68	-38.2739	Ecotour boat
2022-10-21	10:46:06	144.706	-38.2671	Ecotour boat
2022-10-22	11:11:53	144.685	-38.2726	Ecotour boat
2022-10-22	11:40:05	144.698	-38.2823	Ecotour boat
2022-10-23	11:26:39	144.677	-38.2745	Ecotour boat
2022-10-23	12:04:58	144.677	-38.2735	Ecotour boat
2022-10-26	13:47:00	144.675	-38.2673	Ecotour boat
2022-10-27	12:34:51	144.679	-38.2681	Ecotour boat
2022-10-27	13:04:40	144.697	-38.2645	Ecotour boat
2022-10-27	14:44:05	144.686	-38.2604	Ecotour boat
2022-10-27	15:24:21	144.681	-38.2661	Ecotour boat
2022-10-27	16:46:18	144.67	-38.2707	Ecotour boat
2022-10-29	14:20:15	144.669	-38.2718	Ecotour boat
2022-10-29	14:54:07	144.675	-38.2684	Ecotour boat
2022-10-29	12:21:23	144.671	-38.2698	Ecotour boat
2022-11-04	10:45:21	144.678	-38.2773	Ecotour boat
2022-11-04	09:51:38	144.699	-38.2712	Ecotour boat
2022-11-04	11:38:58	144.679	-38.2665	Ecotour boat
2022-11-04	16:06:43	144.7	-38.2583	Ecotour boat
2022-11-04	16:29:57	144.749	-38.1727	Ecotour boat
2022-11-05	09:41:06	144.677	-38.2654	Ecotour boat
2022-11-05	10:18:39	144.683	-38.2607	Ecotour boat
2022-11-05	13:01:29	144.697	-38.2811	Ecotour boat
2022-11-05	16:58:22	144.706	-38.2794	Ecotour boat
2022-11-05	17:27:37	144.68	-38.2746	Ecotour boat
2022-11-07	07:54:57	144.713	-38.294	Ecotour boat
2022-11-07	09:13:39	144.844	-38.2292	Ecotour boat
2022-11-08	11:22:04	144.689	-38.2676	Ecotour boat
2022-11-08	11:55:48	144.67	-38.2709	Ecotour boat
2022-11-08	15:28:06	144.884	-38.3471	Ecotour boat
2022-11-10	12:40:47	144.664	-38.2755	Ecotour boat
2022-11-11	09:39:49	144.685	-38.2874	Ecotour boat
2022-11-11	10:15:42	144.675	-38.2744	Ecotour boat
2022-11-17	17:01:35	144.698	-38.3113	Ecotour boat
2022-11-17	16:54:21	144.668	-38.2718	Ecotour boat
2022-11-17	14:30:05	144.673	-38.2651	Ecotour boat
2022-11-17	15:17:00	144.699	-38.2889	Ecotour boat
2022-11-18	09:57:01	144.694	-38.2786	Ecotour boat
2022-11-18	11:56:19	144.708	-38.2602	Ecotour boat
2022-11-18	14:45:26	144.73	-38.2726	Ecotour boat
2022-11-18	16:29:31	144.728	-38.284	Ecotour boat
2022-11-23	15:23:47	144.706	-38.3106	Ecotour boat
2022-11-24	11:38:21	144.704	-38.2798	Ecotour boat
2022-11-25	15:28:21	144.72	-38.2432	Ecotour boat
2022-11-25	16:09:54	144.722	-38.1236	Ecotour boat
2022-11-26	11:47:06	144.701	-38.2588	Ecotour boat
2022-11-28	09:51:39	144.684	-38.273	Ecotour boat
2022-11-29	16:06:33	144.682	-38.2805	Ecotour boat
2022-11-30	10:53:06	144.485	-38.1008	Ecotour boat
2022-11-30	11:50:40	144.674	-38.2684	Ecotour boat
2022-12-02	09:31:39	144.686	-38.2795	Ecotour boat
2022-12-02	13:27:22	144.741	-38.2068	Ecotour boat
2022-12-02	12:00:50	144.702	-38.2597	Ecotour boat
2022-12-06	12:27:11	144.694	-38.2723	Ecotour boat
2022-12-09	12:18:13	144.678	-38.2707	Ecotour boat
2022-12-10	16:10:40	144.712	-38.2767	Ecotour boat
2022-12-10	11:51:35	144.696	-38.2812	Ecotour boat
2022-12-10	12:21:37	144.693	-38.2685	Ecotour boat
2022-12-16	10:50:21	144.741	-38.3148	Ecotour boat
2022-12-17	10:01:53	144.72	-38.3106	Ecotour boat
2022-12-19	13:01:03	144.727	-38.2882	Ecotour boat
2022-12-20	11:23:37	144.727	-38.2879	Ecotour boat
2022-12-23	12:48:42	144.685	-38.2693	Ecotour boat
2022-12-23	14:37:02	144.679	-38.2954	Ecotour boat
2022-12-24	12:37:58	144.681	-38.2818	Ecotour boat
2022-12-26	15:46:29	144.723	-38.3047	Ecotour boat
2022-12-26	09:50:58	144.697	-38.2756	Ecotour boat
2022-12-27	10:40:47	144.699	-38.3064	Ecotour boat
2022-12-30	10:31:04	144.716	-38.3159	Ecotour boat
2022-12-30	15:36:54	144.716	-38.3046	Ecotour boat
2022-12-31	11:04:51	144.693	-38.2792	Ecotour boat
2022-12-31	13:11:50	144.699	-38.277	Ecotour boat
2023-01-01	10:45:33	144.719	-38.3018	Ecotour boat
2023-01-01	12:48:03	144.704	-38.2937	Ecotour boat
2023-01-02	10:29:51	144.698	-38.2762	Ecotour boat
2023-01-02	15:05:17	144.721	-38.3166	Ecotour boat
2023-01-03	15:34:35	144.738	-38.3206	Ecotour boat
2023-01-05	11:17:44	144.702	-38.2741	Ecotour boat
2023-01-07	16:03:08	144.724	-38.3151	Ecotour boat
2023-01-08	16:32:35	144.7	-38.2545	Ecotour boat
2023-01-10	14:32:29	144.7	-38.271	Ecotour boat
2023-01-10	09:55:07	144.709	-38.2803	Ecotour boat
2023-01-12	15:21:49	144.714	-38.2805	Ecotour boat
2023-01-12	10:45:35	144.761	-38.3395	Ecotour boat
2023-01-13	09:26:28	144.695	-38.2884	Ecotour boat
2023-01-14	16:10:31	144.707	-38.2572	Ecotour boat
2023-01-14	19:20:30	144.712	-38.2889	Ecotour boat
2023-01-17	09:26:04	144.695	-38.2778	Ecotour boat
2023-01-17	09:58:17	144.723	-38.2914	Ecotour boat
2023-01-20	09:39:39	144.737	-38.3162	Ecotour boat
2023-01-21	09:03:01	144.673	-38.2649	Ecotour boat
2023-01-23	10:06:39	144.718	-38.2524	Ecotour boat
2023-01-24	11:41:35	144.772	-38.1637	Ecotour boat
2023-01-25	10:45:30	144.744	-38.313	Ecotour boat
2023-01-27	15:46:31	144.693	-38.278	Ecotour boat
2023-01-27	10:18:13	144.707	-38.3093	Ecotour boat
2023-01-28	19:45:31	144.729	-38.294	Ecotour boat
2023-01-28	14:14:01	144.797	-38.3599	Ecotour boat
2023-01-28	15:39:02	144.807	-38.3593	Ecotour boat
2023-01-28	14:29:03	144.682	-38.269	Ecotour boat
2023-01-29	10:55:16	144.725	-38.3136	Ecotour boat
2023-01-30	10:51:40	144.741	-38.322	Ecotour boat
2023-01-31	08:22:15	144.706	-38.2547	Ecotour boat
2023-01-31	09:33:27	144.506	-38.0951	Ecotour boat
2023-02-06	14:30:06	144.698	-38.3015	Ecotour boat
2023-02-06	15:31:02	144.712	-38.3078	Ecotour boat
2023-02-08	08:25:21	144.702	-38.2622	Ecotour boat
2023-02-08	08:48:53	144.784	-38.1592	Ecotour boat
2023-02-08	10:28:33	144.707	-38.3082	Ecotour boat
